# Supplementary material for: Associations between Interleukin Gene Polymorphisms and Risks of Developing Extremity Posttraumatic Osteomyelitis in Chinese Han Population
Source: Hindawi journal article supplement (doi:10.1155/2020/3278081), 2020-05-05
Supplement: f1 [file 3278081.f1.pdf]

**Table S1 PCR primers and extension primers of the *IL* gene polymorphisms**

| SNP       | PCR primers                                                       | Extension primers                                       |
|-----------|-------------------------------------------------------------------|---------------------------------------------------------|
| rs16944   | F: 5'-ATGTGGGACAAAGTGGAAGAC-3'<br>R: 5'-CAATTTTCTCCTCAGAGGCTC-3'  | 5'-TTTTTTTTTTTTTCTTGGGTGCTGTTCTCTGCCTC-3'               |
| rs1143627 | F: 5'-TCCACCAATACTCTTTTCCCC-3'<br>R: 5'-CCCTTAGCACCTAGTTGTAAG-3'  | 5'-TTTTTTTTTTTTTTTTTTCCTACTTCTGCTTTTGAAAGC-3'           |
| rs1143634 | F: 5'-CTACTGGTGTGTCATCAGAC-3'<br>R: 5'-AGCTTTTTTGCTGTGAGTCCC-3'   | 5'-TTTTTTTTTTTTTTTTTTTAAGCCTCGTTATCCCATGTGTC-3'         |
| rs2853550 | F: 5'-ACTAAAGCCCACTCCTCATTG-3'<br>R: 5'-ATAGCGCTTGCTCAACAGATG-3'  | 5'-TTTTTTTTTTTTTTTTTTTTTTCAGAAGGATATTCAGTGCACAT-3'      |
| rs1800587 | F: 5'-GTGTTCTACCACCTGAACTAG-3'<br>R: 5'-ATATGCCCAAGGTGTGTCTTC-3'  | 5'-TTTTTTTTTTTTTTTTTTTTTTTTTTTTTTTACATATGAGCCTTCAATG-3' |
| rs17561   | F: 5'-CCTCCAGAACTATTTTCCCTG-3'<br>R: 5'-TGAGGTACTGATCATTGGCTC-3'  | 5'-TTTTTTTTTTTTTTTTTAGAAATCATCAAGCCTAGGTCA-3'           |
| rs4251961 | F: 5'-GATTGTAGGTGGCAAGATTGG-3'<br>R: 5'-TGCCCTTCAGACCTCATTG-3'    | 5'-GTCTAAGATAGGGCAGATAGCA-3'                            |
| rs419598  | F: 5'-CACTACAGCTGAGTCCTTTTC-3'<br>R: 5'-CAAGGATTAGGACATTGCACC-3'  | 5'-CATTTGGTCCTTGCAAGTATCC-3'                            |
| rs315951  | F: 5'-TAGAAAGACCATTCTGGAGGC-3'<br>R: 5'-AATTCTACTTCCAGGAGGACG-3'  | 5'-TTTTTTTTTGGCAGAGTCCTGTGACCAGGTT-3'                   |
| rs2243248 | F: 5'-ACTGACTAGGAGGGCTGATTTG-3'<br>R: 5'-TATGTTGCCTAGGCTCATCTC-3' | 5'-TTTTTTTTTTTTTTTTTCTGATTTGTAAGTTGGTAAGAC-3'           |
| rs2243250 | F: 5'-CCTCAGAATAGACCTACCTTG-3'<br>R: 5'-CATCTTGGAAGTGTCTGTC-3'    | 5'-CCTAAACTTGGGAGAACATTGT-3'                            |
| rs1800795 | F: 5'-CGCTAGCCTCAATGACGACCT-3'                                    | 5'-TTTTTTTTTGCAATGTGACGTCCTTTAGCAT-3'                   |

---

|           |                                                                                                    |                                                   |
|-----------|----------------------------------------------------------------------------------------------------|---------------------------------------------------|
| rs1800796 | R: 5'-TTGAGACTCTAATATTGAGAC-3'<br>F: 5'-AGGTGAAGAAAGTGGCAGAAG-3'<br>R: 5'-AAGAAGGTAATACTACCAGTC-3' | 5'-TTTTTTTTTTTTTTTTTTTTTGTGTTCTGGCTCTCCCTGTGAG-3' |
| rs1800797 | F: 5'-AGGTGAAGAAAGTGGCAGAAG-3'<br>R: 5'-AAGAAGGTAATACTACCAGTC-3'                                   | 5'-CTGTTGTAGAACTGCCTGGCCA-3'                      |
| rs4073    | F: 5'-GATCTTGTCTAACACCTGCC-3'<br>R: 5'-AACCTGAGTCATCACACTTCC-3'                                    | 5'-TTTTTTTTTTCCACAATTTGGTGAATTATCAA-3'            |
| rs2227306 | F: 5'-GGCAATTTCTATGCTGGAGAG-3'<br>R: 5'-TCCTGAATATTCTCCTAGCCC-3'                                   | 5'-GTCATAACTGACAACATTGAAC-3'                      |
| rs2227307 | F: 5'-GATGCTTTGGTAAACAAACATCC-3'<br>R: 5'-GGTAACCGTGGTTCTCAATAG-3'                                 | 5'-TTTTTTTTTTTTTTTTTTTACGTTAAATATATGCATGCTAC-3'   |
| rs3024491 | F: 5'-TTTCCAGACCTGAAAGACCAG-3'<br>R: 5'-ACTCAGTCCTGGTCTTCTTTC-3'                                   | 5'-TTTTTTTTTTTTTTTTTTTGACATAGGTGTCCCTTAAAGCC-3'   |
| rs3024496 | F: 5'-AGAGGTCTCCAAAATCGGATC-3'<br>R: 5'-TGTGTCACCCTATGGAAACAG-3'                                   | 5'-AGAAACCTTATTGTACCTCTCT-3'                      |
| rs1800871 | F: 5'-AACTTTAGACTCCAGCCACAG-3'<br>R: 5'-TATGCTAGTCAGGTAGTGCTC-3'                                   | 5'-GAGCAAACCTGAGGCACAGAGAT-3'                     |
| rs1800872 | F: 5'-AGAGGTGGAAACATGTGCCTG-3'<br>R: 5'-CTTGCTAACTTAGGCAGTCAC-3'                                   | 5'-TTTTTTTTTTTTTTTTCACATCCTGTGACCCCGCCTGT-3'      |
| rs1800896 | F: 5'-ATCCAAGACAACACTACTAAG-3'<br>R: 5'-TGTAAGCTTCTGTGGCTGGAG-3'                                   | 5'-CACTACTAAGGCTTCTTTGGGA-3'                      |
| rs2275913 | F: 5'-CTCTGCTCAGCTTCTAACAAG-3'<br>R: 5'-GGACAAAATGTAGCGCTATCG-3'                                   | 5'-TTTTTTTTTTCCTTCCCATTTTCCTTCAGAAG-3'            |
| rs763780  | F: 5'-TTTCTGTTTCCATCCGTGCAG-3'<br>R: 5'-CAAGGCTGCTCTGTTTCTTTC-3'                                   | 5'-TTTTTTTTTGATATGCACCTCTTACTGCACA-3'             |

---

IL: Interleukin ; SNP: Single Nucleotide Polymorphism; PCR: Polymerase Chain Reaction; F: Forward; R: Reverse.

**Table S2 HWE test outcomes of the *IL* gene polymorphisms for healthy controls**

| <b>SNP</b> | <b><math>\chi^2</math> value</b> | <b><i>P</i> value</b> |
|------------|----------------------------------|-----------------------|
| rs16944    | 1.968                            | 0.161                 |
| rs1143627  | 0.711                            | 0.399                 |
| rs1143634  | 0.046                            | 0.829                 |
| rs2853550  | 0.624                            | 0.429                 |
| rs1800587  | 0.497                            | 0.481                 |
| rs17561    | 0.497                            | 0.481                 |
| rs4251961  | 0.006                            | 0.936                 |
| rs419598   | 0.744                            | 0.388                 |
| rs315951   | 0.833                            | 0.361                 |
| rs2243248  | 0.221                            | 0.638                 |
| rs2243250  | 1.641                            | 0.200                 |
| rs1800795  | 0.000                            | 1.000                 |
| rs1800796  | 0.914                            | 0.339                 |
| rs1800797  | 0.001                            | 0.972                 |
| rs4073     | 0.344                            | 0.557                 |
| rs2227306  | 1.183                            | 0.277                 |
| rs2227307  | 0.584                            | 0.445                 |
| rs3024491  | 1.232                            | 0.267                 |
| rs3024496  | 0.958                            | 0.327                 |
| rs1800871  | 0.002                            | 0.963                 |
| rs1800872  | 0.080                            | 0.778                 |
| rs1800896  | 0.995                            | 0.318                 |
| rs2275913  | 0.134                            | 0.714                 |
| rs763780   | 1.423                            | 0.233                 |

IL: Interleukin; HWE: Hardy-Weinber Equilibrium

**Table S3 Comparisons of genotype distribution, allele frequency, and genetic models of the remaining 20 SNPs between PTOM patients and healthy controls**

| SNP       | Item               |              | Patients    | Controls   | Test statistics | <i>P</i> values | OR (95% CI)         |
|-----------|--------------------|--------------|-------------|------------|-----------------|-----------------|---------------------|
| rs1143634 | Genotype (n, %)    | CC           | 185 (97.88) | 194 (97.0) |                 |                 |                     |
|           |                    | CT           | 4 (2.12)    | 6 (3.0)    | NA              | 0.752           |                     |
|           |                    | TT           | 0 (0.0)     | 0 (0.0)    |                 |                 |                     |
|           | Allele frequency   | T vs. C      | 4/374       | 6/394      | 0.052           | 0.819           | 0.702 (0.197-2.508) |
|           | Dominant model     | TT+CT vs. CC | 4/185       | 6/194      | 0.240           | 0.624           | 0.725 (0.200-2.629) |
|           | Recessive model    | TT vs. CC+CT | 0/189       | 0/200      | NA              | NA              | NA                  |
|           | Heterozygous model | CT vs. CC    | 4/185       | 6/194      | 0.240           | 0.624           | 0.725 (0.200-2.629) |
| rs2853550 | Genotype (n, %)    | CC           | 168 (88.89) | 171 (85.5) |                 |                 |                     |
|           |                    | CT           | 21 (11.11)  | 27 (13.5)  | 2.093           | 0.352           |                     |
|           |                    | TT           | 0 (0.0)     | 2 (1.00)   |                 |                 |                     |
|           | Allele frequency   | T vs. C      | 21/357      | 31/369     | 1.501           | 0.221           | 0.700 (0.395-1.242) |
|           | Dominant model     | TT+CT vs. CC | 21/168      | 29/171     | 1.232           | 0.267           | 0.710 (0.388-1.300) |
|           | Recessive model    | TT vs. CC+CT | 0/199       | 2/198      | 0.000           | 0.999           | 0.000 (0.000-       |
|           | Heterozygous model | CT vs. CC    | 21/168      | 27/171     | 0.730           | 0.393           | 0.766 (0.415-1.413) |
| rs1800587 | Genotype (n, %)    | CC           | 171 (90.48) | 181 (90.5) |                 |                 |                     |
|           |                    | CT           | 16 (8.46)   | 19 (9.5)   | 1.867           | 0.467           |                     |
|           |                    | TT           | 2 (1.06)    | 0 (0.0)    |                 |                 |                     |
|           | Allele frequency   | T vs. C      | 20/358      | 19/381     | 0.119           | 0.730           | 1.120 (0.588-2.134) |

|                  |                   |                 |        |             |            |           |                     |  |
|------------------|-------------------|-----------------|--------|-------------|------------|-----------|---------------------|--|
| rs17561          | Dominant model    | TT+CT vs. CC    | 18/171 | 19/181      | 0.005      | 0.942     | 0.975 (0.493-1.929) |  |
|                  | Recessive model   | TT vs. CC+CT    | 2/187  | 0/200       | 0.000      | 0.999     | /                   |  |
|                  | Homozygous model  | TT vs. CC       | 2/171  | 0/181       | 0.000      | 0.999     | /                   |  |
|                  | Heterzygous model | CT vs. CC       | 16/171 | 19/181      | 0.189      | 0.664     | 0.856 (0.424-1.728) |  |
|                  | Genotype (n, %)   | GG              |        | 171 (90.48) | 181 (90.5) |           |                     |  |
|                  |                   | GT              |        | 17 (8.99)   | 19 (9.5)   | 1.031     | 0.860               |  |
|                  |                   | TT              |        | 1 (0.53)    | 0 (0.0)    |           |                     |  |
|                  | Allele frequency  | T vs. G         | 19/359 | 19/381      | 0.032      | 0.858     | 1.061 (0.553-2.037) |  |
|                  | Dominant model    | TT+GT vs. GG    | 18/171 | 19/181      | 0.001      | 0.980     | 0.991 (0.501-1.961) |  |
|                  | Recessive model   | TT vs. GG+GT    | 1/181  | 0/200       | 0.000      | 1.000     | /                   |  |
| Homozygous model | TT vs. GG         | 1/171           | 0/181  | 0.000       | 1.000      | /         |                     |  |
| rs419598         | Heterzygous model | GT vs. GG       | 17/171 | 19/181      | 0.051      | 0.821     | 0.923 (0.462-1.844) |  |
|                  | Genotype (n, %)   | TT              |        | 158 (83.60) | 177 (88.5) |           |                     |  |
|                  |                   | CT              |        | 30 (15.87)  | 23 (11.5)  | 2.620     | 0.210               |  |
|                  |                   | CC              |        | 1 (0.53)    | 0 (0.0)    |           |                     |  |
|                  | Allele frequency  | C vs. T         | 32/346 | 23/377      | 2.182      | 0.140     | 1.516 (0.870-2.642) |  |
|                  | Dominant model    | CC+CT vs. TT    | 31/158 | 23/177      | 1.442      | 0.230     | 1.431 (0.797-2.569) |  |
|                  | Recessive model   | CC vs. TT+CT    | 1/188  | 0/200       | 0.000      | 1.000     | /                   |  |
|                  | Homozygous model  | CC vs. TT       | 1/158  | 0/177       | 0.000      | 1.000     | /                   |  |
|                  | Heterzygous model | CT vs. TT       | 30/158 | 23/177      | 1.203      | 0.273     | 1.390 (0.772-2.504) |  |
|                  | rs315951          | Genotype (n, %) | GG     |             | 35 (18.52) | 38 (19.0) |                     |  |
| CG               |                   |                 |        | 91 (48.15)  | 91 (45.5)  | 0.290     | 0.865               |  |
| CC               |                   |                 |        | 63 (33.33)  | 71 (35.5)  |           |                     |  |

|           |                   |              |             |            |       |       |                      |
|-----------|-------------------|--------------|-------------|------------|-------|-------|----------------------|
|           | Allele frequency  | C vs. G      | 217/161     | 233/167    | 0.057 | 0.812 | 0.966 (0.727-1.284)  |
|           | Dominant model    | CC+CG vs. GG | 154/35      | 162/38     | 0.001 | 0.982 | 1.006 (0.602-1.681)  |
|           | Recessive model   | CC vs. GG+CG | 63/126      | 71/129     | 0.153 | 0.696 | 0.919 (0.603-1.402)  |
|           | Homozygous model  | CC vs. GG    | 63/35       | 71/38      | 0.029 | 0.864 | 0.951 (0.535-1.690)  |
|           | Heterzygous model | CG vs. GG    | 91/35       | 91/38      | 0.029 | 0.865 | 1.049 (0.606-1.814)  |
| rs2243248 | Genotype (n, %)   | TT           | 157 (83.07) | 166 (83.0) |       |       |                      |
|           |                   | GT           | 31 (16.40)  | 33 (16.5)  | 0.253 | 1.000 |                      |
|           |                   | GG           | 1 (0.53)    | 1 (0.5)    |       |       |                      |
|           | Allele frequency  | G vs. T      | 33/345      | 35/365     | 0.000 | 0.992 | 0.998 (0.606-1.641)  |
|           | Dominant model    | GG+GT vs. TT | 32/157      | 34/166     | 0.026 | 0.872 | 1.045 (0.612-1.786)  |
|           | Recessive model   | GG vs. TT+GT | 1/188       | 1/199      | 0.008 | 0.931 | 1.133 (0.068-18.841) |
|           | Homozygous model  | GG vs. TT    | 1/157       | 1/166      | 0.009 | 0.926 | 1.142 (0.068-19.032) |
|           | Heterzygous model | GT vs. TT    | 31/157      | 33/166     | 0.022 | 0.881 | 1.042 (0.606-1.793)  |
| rs2243250 | Genotype (n, %)   | CC           | 5 (2.65)    | 6 (3.0)    |       |       |                      |
|           |                   | CT           | 55 (29.10)  | 73 (36.5)  | 2.569 | 0.277 |                      |
|           |                   | TT           | 129 (68.25) | 121 (60.5) |       |       |                      |
|           | Allele frequency  | T vs. C      | 313/65      | 315/85     | 2.053 | 0.152 | 1.299 (0.908-1.860)  |
|           | Dominant model    | TT+CT vs. CC | 184/5       | 194/6      | 0.002 | 0.967 | 1.026 (0.302-3.481)  |
|           | Recessive model   | TT vs. CC+CT | 129/60      | 121/79     | 2.119 | 0.146 | 1.366 (0.897-2.081)  |
|           | Homozygous model  | TT vs. CC    | 129/5       | 121/6      | 0.049 | 0.826 | 1.148 (0.336-3.929)  |
|           | Heterzygous model | CT vs. CC    | 55/5        | 73/6       | 0.087 | 0.768 | 0.828 (0.236-2.903)  |
| rs1800795 | Genotype (n, %)   | GG           | 187 (99.47) | 200 (100)  |       |       |                      |
|           |                   | CG           | 1 (0.53)    | 0 (0.0)    | NA    | 0.485 |                      |

|           |                   |              |             |            |       |       |                      |
|-----------|-------------------|--------------|-------------|------------|-------|-------|----------------------|
|           |                   | CC           | 0 (0.0)     | 0 (0.0)    |       |       |                      |
|           | Allele frequency  | C vs. G      | 1/375       | 0/400      | NA    | 0.485 | 0.997 (0.992-1.003)  |
|           | Dominant model    | CC+CG vs. GG | 1/187       | 0/200      | 0.000 | 1.000 | /                    |
|           | Recessive model   | CC vs. GG+CG | 0/188       | 0/200      | NA    | NA    | NA                   |
|           | Homozygous model  | CC vs. GG    | 0/187       | 0/200      | NA    | NA    | NA                   |
|           | Heterzygous model | CG vs. GG    | 1/187       | 0/200      | 0.000 | 1.000 | /                    |
| rs1800797 | Genotype (n, %)   | GG           | 187 (98.94) | 199 (99.5) |       |       |                      |
|           |                   | AG           | 2 (1.06)    | 1 (0.5)    | NA    | 0.614 |                      |
|           |                   | AA           | 0 (0.0)     | 0 (0.0)    |       |       |                      |
|           | Allele frequency  | A vs. G      | 2/376       | 1/399      | 0.002 | 0.961 | 2.122 (0.192-23.502) |
|           | Dominant model    | AA+AG vs. GG | 2/187       | 1/199      | 0.257 | 0.612 | 1.866 (0.167-20.823) |
|           | Recessive model   | AA vs. GG+AG | 0/189       | 0/200      | NA    | NA    | NA                   |
|           | Homozygous model  | AA vs. GG    | 0/187       | 0/199      | NA    | NA    | NA                   |
|           | Heterzygous model | AG vs. GG    | 2/187       | 1/199      | 0.257 | 0.612 | 1.866 (0.167-20.823) |
| rs4073    | Genotype (n, %)   | AA           | 37 (19.58)  | 32 (16.0)  |       |       |                      |
|           |                   | AT           | 77 (40.74)  | 91 (45.5)  | 1.245 | 0.537 |                      |
|           |                   | TT           | 75 (39.68)  | 77 (38.5)  |       |       |                      |
|           | Allele frequency  | T vs. A      | 227/151     | 245/155    | 0.117 | 0.733 | 0.951 (0.713-1.268)  |
|           | Dominant model    | TT+AT vs. AA | 152/37      | 168/32     | 1.190 | 0.275 | 0.745 (0.439-1.265)  |
|           | Recessive model   | TT vs. AA+AT | 75/114      | 77/123     | 0.004 | 0.952 | 1.013 (0.671-1.529)  |
|           | Homozygous model  | TT vs. AA    | 75/37       | 77/32      | 0.633 | 0.426 | 0.790 (0.443-1.411)  |
|           | Heterzygous model | AT vs. AA    | 77/37       | 91/32      | 1.429 | 0.232 | 0.707 (0.400-1.248)  |
| rs2227306 | Genotype (n, %)   | CC           | 94 (49.74)  | 81 (40.5)  |       |       |                      |

|           |                   |              |             |            |       |       |                     |
|-----------|-------------------|--------------|-------------|------------|-------|-------|---------------------|
|           |                   | CT           | 74 (39.15)  | 98 (49.0)  | 4.007 | 0.135 |                     |
|           |                   | TT           | 21 (11.11)  | 21 (10.5)  |       |       |                     |
|           | Allele frequency  | T vs. C      | 116/262     | 140/260    | 1.637 | 0.201 | 0.822 (0.609-1.110) |
|           | Dominant model    | TT+CT vs. CC | 95/94       | 119/81     | 2.609 | 0.106 | 0.716 (0.477-1.074) |
|           | Recessive model   | TT vs. CC+CT | 21/168      | 21/179     | 0.080 | 0.778 | 1.098 (0.575-2.097) |
|           | Homozygous model  | TT vs. CC    | 21/94       | 21/81      | 0.088 | 0.767 | 0.902 (0.456-1.784) |
|           | Heterzygous model | CT vs. CC    | 78/94       | 98/81      | 3.206 | 0.073 | 0.677 (0.441-1.038) |
| rs2227307 | Genotype (n, %)   | TT           | 76 (40.21)  | 74 (37.0)  |       |       |                     |
|           |                   | GT           | 78 (41.27)  | 91 (45.5)  | 0.716 | 0.699 |                     |
|           |                   | GG           | 35 (18.52)  | 35 (17.5)  |       |       |                     |
|           | Allele frequency  | G vs. T      | 148/230     | 161/239    | 0.098 | 0.755 | 0.955 (0.717-1.273) |
|           | Dominant model    | GG+GT vs. TT | 113/76      | 126/74     | 0.202 | 0.653 | 0.909 (0.601-1.376) |
|           | Recessive model   | GG vs. TT+GT | 35/154      | 35/165     |       | 0.648 | 1.130 (0.668-1.912) |
|           | Homozygous model  | GG vs. TT    | 35/76       | 35/74      | 0.020 | 0.887 | 1.043 (0.585-1.858) |
|           | Heterzygous model | GT vs. TT    | 78/76       | 91/74      | 0.435 | 0.509 | 0.861 (0.552-1.343) |
| rs3024491 | Genotype (n, %)   | GG           | 178 (94.18) | 184 (92.0) |       |       |                     |
|           |                   | GT           | 11 (5.82)   | 15 (7.5)   | 1.339 | 0.548 |                     |
|           |                   | TT           | 0 (0.0)     | 1 (0.5)    |       |       |                     |
|           | Allele frequency  | T vs. G      | 11/367      | 17/383     | 1.006 | 0.316 | 0.675 (0.312-1.461) |
|           | Dominant model    | TT+GT vs. GG | 11/178      | 16/184     | 0.271 | 0.603 | 0.806 (0.357-1.816) |
|           | Recessive model   | TT vs. GG+GT | 0/189       | 1/199      | NA    | NA    | NA                  |
|           | Homozygous model  | TT vs. GG    | 0/178       | 1/184      | NA    | NA    | NA                  |
|           | Heterzygous model | GT vs. GG    | 11/178      | 15/184     | 0.271 | 0.603 | 0.806 (0.357-1.816) |



|           |                    |              |             |            |       |       |                     |
|-----------|--------------------|--------------|-------------|------------|-------|-------|---------------------|
| rs3024496 | Genotype (n, %)    | CC           | 0 (0.0)     | 1 (0.5)    |       |       |                     |
|           |                    | CT           | 11 (5.82)   | 16 (8.0)   | 1.611 | 0.431 |                     |
|           |                    | TT           | 178 (94.18) | 183 (91.5) |       |       |                     |
|           | Allele frequency   | T vs. C      | 367/11      | 382/18     | 1.369 | 0.242 | 1.572 (0.733-3.374) |
|           | Dominant model     | TT+CT vs. CC | 189/0       | 199/1      | 0.000 | 1.000 | /                   |
|           | Recessive model    | TT vs. CC+CT | 178/11      | 183/17     | 0.788 | 0.375 | 1.433 (0.648-3.169) |
|           | Heterozygous model | CT vs. CC    | 11/0        | 16/1       | 0.000 | 1.000 | /                   |
| rs1800871 | Genotype (n, %)    | CC           | 15 (7.94)   | 25 (12.5)  |       |       |                     |
|           |                    | CT           | 89 (47.09)  | 91 (45.5)  | 2.219 | 0.330 |                     |
|           |                    | TT           | 85 (44.97)  | 84 (42.0)  |       |       |                     |
|           | Allele frequency   | T vs. C      | 259/119     | 259/141    | 1.240 | 0.265 | 1.185 (0.879-1.597) |
|           | Dominant model     | TT+CT vs. CC | 174/15      | 175/25     | 2.370 | 0.124 | 1.704 (0.865-3.357) |
|           | Recessive model    | TT vs. CC+CT | 85/104      | 84/116     | 0.204 | 0.651 | 1.098 (0.733-1.645) |
|           | Heterozygous model | CT vs. CC    | 89/15       | 91/25      | 2.180 | 0.140 | 1.707 (0.839-3.470) |
| rs1800872 | Genotype (n, %)    | CC           | 15 (7.94)   | 25 (12.5)  |       |       |                     |
|           |                    | AC           | 88 (46.56)  | 94 (47.0)  | 2.538 | 0.281 |                     |
|           |                    | AA           | 86 (45.50)  | 81 (40.5)  |       |       |                     |
|           | Allele frequency   | A vs. C      | 260/118     | 256/144    | 1.991 | 0.158 | 1.239 (0.920-1.670) |
|           | Dominant model     | AA+AC vs. CC | 174/15      | 175/25     | 2.370 | 0.124 | 1.704 (0.865-3.357) |
|           | Recessive model    | AA vs. CC+AC | 86/103      | 81/119     | 0.699 | 0.403 | 1.189 (0.793-1.783) |
|           | Homozygous model   | AA vs. CC    | 86/15       | 84/25      | 2.513 | 0.113 | 1.779 (0.873-3.628) |

|                 |                   |              |             |            |       |                      |                     |
|-----------------|-------------------|--------------|-------------|------------|-------|----------------------|---------------------|
| rs1800896       | Heterzygous model | AC vs. CC    | 88/15       | 94/25      | 1.848 | 0.174                | 1.635 (0.805-3.322) |
|                 | Genotype (n, %)   | AA           | 165 (87.30) | 173 (86.5) |       |                      |                     |
|                 |                   | AG           | 24 (12.70)  | 25 (12.5)  | 1.538 | 0.642                |                     |
|                 |                   | GG           | 0 (0.0)     | 2 (1.0)    |       |                      |                     |
|                 | Allele frequency  | G vs. A      | 24/354      | 29/371     | 0.248 | 0.618                | 0.867 (0.495-1.519) |
|                 | Dominant model    | GG+AG vs. AA | 24/165      | 27/173     | 0.012 | 0.912                | 0.967 (0.532-1.756) |
|                 | Recessive model   | GG vs. AA+AG | 0/189       | 2/198      | 0.000 | 0.999                | /                   |
| rs2275913       | Homozygous model  | GG vs. AA    | 0/165       | 2/173      | 0.000 | 0.999                | /                   |
|                 | Heterzygous model | AG vs. AA    | 24/165      | 25/173     | 0.030 | 0.862                | 1.055 (0.575-1.937) |
|                 | Genotype (n, %)   | AA           | 43 (22.75)  | 45 (22.5)  |       |                      |                     |
|                 |                   | AG           | 104 (55.03) | 97 (48.5)  | 2.540 | 0.281                |                     |
|                 |                   | GG           | 42 (22.22)  | 58 (29.0)  |       |                      |                     |
|                 | Allele frequency  | G vs. A      | 188/190     | 213/187    | 0.961 | 0.327                | 0.869 (0.656-1.151) |
|                 | Dominant model    | GG+AG vs. AA | 146/43      | 155/45     | 0.001 | 0.978                | 1.007 (0.624-1.625) |
| Recessive model | GG vs. AA+AG      | 42/147       | 58/142      | 3.024      | 0.082 | 0.662 (0.416-1.054)  |                     |
| rs763780        | Homozygous model  | GG vs. AA    | 42/43       | 58/45      | 1.027 | 0.311                | 0.741 (0.414-1.324) |
|                 | Heterzygous model | AG vs. AA    | 104/43      | 97/45      | 0.395 | 0.530                | 1.177 (0.708-1.954) |
|                 | Genotype (n, %)   | TT           | 132 (69.84) | 145 (72.5) |       |                      |                     |
|                 |                   | CT           | 51 (26.98)  | 53 (26.5)  | 2.238 | 0.326                |                     |
|                 |                   | CC           | 6 (3.17)    | 2 (1.0)    |       |                      |                     |
|                 | Allele frequency  | C vs. T      | 63/315      | 57/343     | 0.870 | 0.351                | 1.204 (0.815-1.777) |
|                 | Dominant model    | CC+CT vs. TT | 57/132      | 55/145     | 0.458 | 0.499                | 1.165 (0.748-1.815) |
| Recessive model | CC vs. TT+CT      | 6/183        | 2/198       | 1.742      | 0.187 | 2.977 (0.589-15.036) |                     |

---

|                   |           |        |        |       |       |                      |
|-------------------|-----------|--------|--------|-------|-------|----------------------|
| Homozygous model  | CC vs. TT | 6/132  | 2/145  | 1.802 | 0.179 | 3.041 (0.600-15.426) |
| Heterzygous model | CT vs. TT | 51/132 | 53/145 | 0.132 | 0.716 | 1.088 (0.690-1.716)  |

---

PTOM: Posttraumatic osteomyelitis; OR: odds ratio, CI: confidence interval; NA: not available.
